# Supplementary material for: Electrical Tuning of Optical Stark Effect in Monolayer WS2
Source: Research Square preprint supplement (doi:10.21203/rs.3.rs-5912464/v1), 2025-01-30
Supplement: Supplementary file 1 [file 039d68da396c8d088012a22c.docx]

**Supplemental Information for:**

**Electrical tuning of optical Stark effect in monolayer WS2**

Xiu Zhang 1,2,3, Tingxiao Qin1, Junzhi Zhu1,2,3, Haiyun Huang1,2,3, Mengdi Zhang1, Baixu Xiang4, Qihua Xiong1,4,5,6*, and Haiyun Liu1*

1 Division of Quantum State of Matter, Beijing Academy of Quantum Information Sciences, Beijing 100193, China;

2 Beijing National Laboratory for Condensed Matter Physics, Institute of Physics, Chinese Academy of Sciences, Beijing 100190, China;

3 School of Physical Sciences, University of Chinese Academy of Sciences, Beijing 100049, China;

4 State Key Laboratory of Low-Dimensional Quantum Physics and Department of Physics, Tsinghua University, Beijing 100084, China;

5 Frontier Science Center for Quantum Information, Beijing 100084, China;

6 Collaborative Innovation Center of Quantum Matter, Beijing 100084, China.

**To whom correspondence should be addressed.*

*Emails:* Q.X. qihua_xiong@tsinghua.edu.cn and H.L. liuhy@baqis.ac.cn

S1. Sample fabrication and characterization

S2. Steady-state RC measurements

S3. TAS results under resonant excitation

S4. TAS results by below-resonance excitation and pump-probe with opposite circular polarization (OCP) configuration

S5. The optical Stark effect at different gate voltages

S6. Transient RC spectra and the OSE-induced blue shift from -50 to 50 V

S7. The optical Stark effect as a function of pump fluence at 0 V

S8. Transient RC spectra and the OSE-induced blue shift as a function of pump fluence

**S1. Sample fabrication and characterization**

The back-gated device consists of ML-WS2, encapsulated by few-layer hexagonal boron nitride (hBN) on both the top and bottom sides (Fig. S1(a)). The high-quality ML-WS2 was prepared on a polydimethylsiloxane (PDMS) stamp by mechanical exfoliation from commercially sourced bulk material (HQ Graphene). The ML-WS2 samples were then carefully transferred from the PDMS stamp onto the Au electrodes deposited on 285 nm SiO2/Si p-type dry oxide substrates, ensuring that smooth, seamless large area monolayers were obtained during the transfer process. The electrodes were fabricated by laser direct writing technology. First, the polymethyl Methacrylate (PMMA) masks were spin-coated on the substrates, and the patterned electrical contact areas were defined on the masks by laser writing. Subsequently, 5 nm Cr/ 60 nm Au electrical contacts were deposited by thermal evaporation. After being dissolved in organic solvent and cleaned by oxygen plasma, the pre-fabricated electrodes were finally finished. To control the doped electron density of the devices in our experiments, a back-gate voltage was applied to the Si substrate with ML-WS2 grounded.

The Raman spectrum (Fig. S1(b)) exhibits two first-order Raman peaks labeled as E2g and A1g, along with other resonant structures. The peaks at approximately 354.6 and 418 cm−1 agree with the in-plane and out-of-plane vibrations with E2g and A1g symmetries, respectively. These peak frequencies are consistent with the previous Raman measurements1 in ML-WS2.

The photoluminescence (PL) spectrum at room temperature (Fig. S1(c)) presents a characteristic Lorentzian curve, displaying a strong excitonic emission peak at ~2.01 eV with a full width at half-maximum of 23.8 meV, which is consistent with previous report2.





Figure S1: (a) Photomicrograph of the back-gated device. (b) Raman spectrum of ML-WS2 on SiO2 substrate excited by a 532 nm laser line at room temperature. The red triangles denote other resonant structures. (c) PL spectrum of ML-WS2 at room temperature. The dashed curve presents a Lorentzian fit.

**S2. Steady-state RC measurements**

In the reflectance contrast (RC) experiments, we employed a home-built spectroscopy setup to measure the reflectivity spectra from the sample and substrate. The broadband light from a tungsten quartz halogen source was focused onto the sample by a 100× objective (NA= 0.7), creating a spot of ~3 μm in diameter on the sample. The reflected light from the back-gate device was collected by the same objective and detected by a spectrometer equipped with a grating (600 lines mm−1) and a liquid nitrogen-cooled charge-coupled device (CCD). The measurements were performed at temperatures from 77 to 295 K. We estimate the electron density by means of the standard capacitance analysis as:

(1)

where *Q* is the quantity of electric charge, *S* is the overlap between ML-WS2 and silicon contributing to the formation of capacitance, is the dielectric constant in vacuum, and are the relative dielectric constants of SiO2 and hBN, respectively, and are thicknesses of SiO2 and hBN, respectively. Here we use 285 nm, 25 nm, 4, 2.2, yielding an injected hole density of ~ 3.65 × 1012 cm-2 at a gate voltage of -50 V.


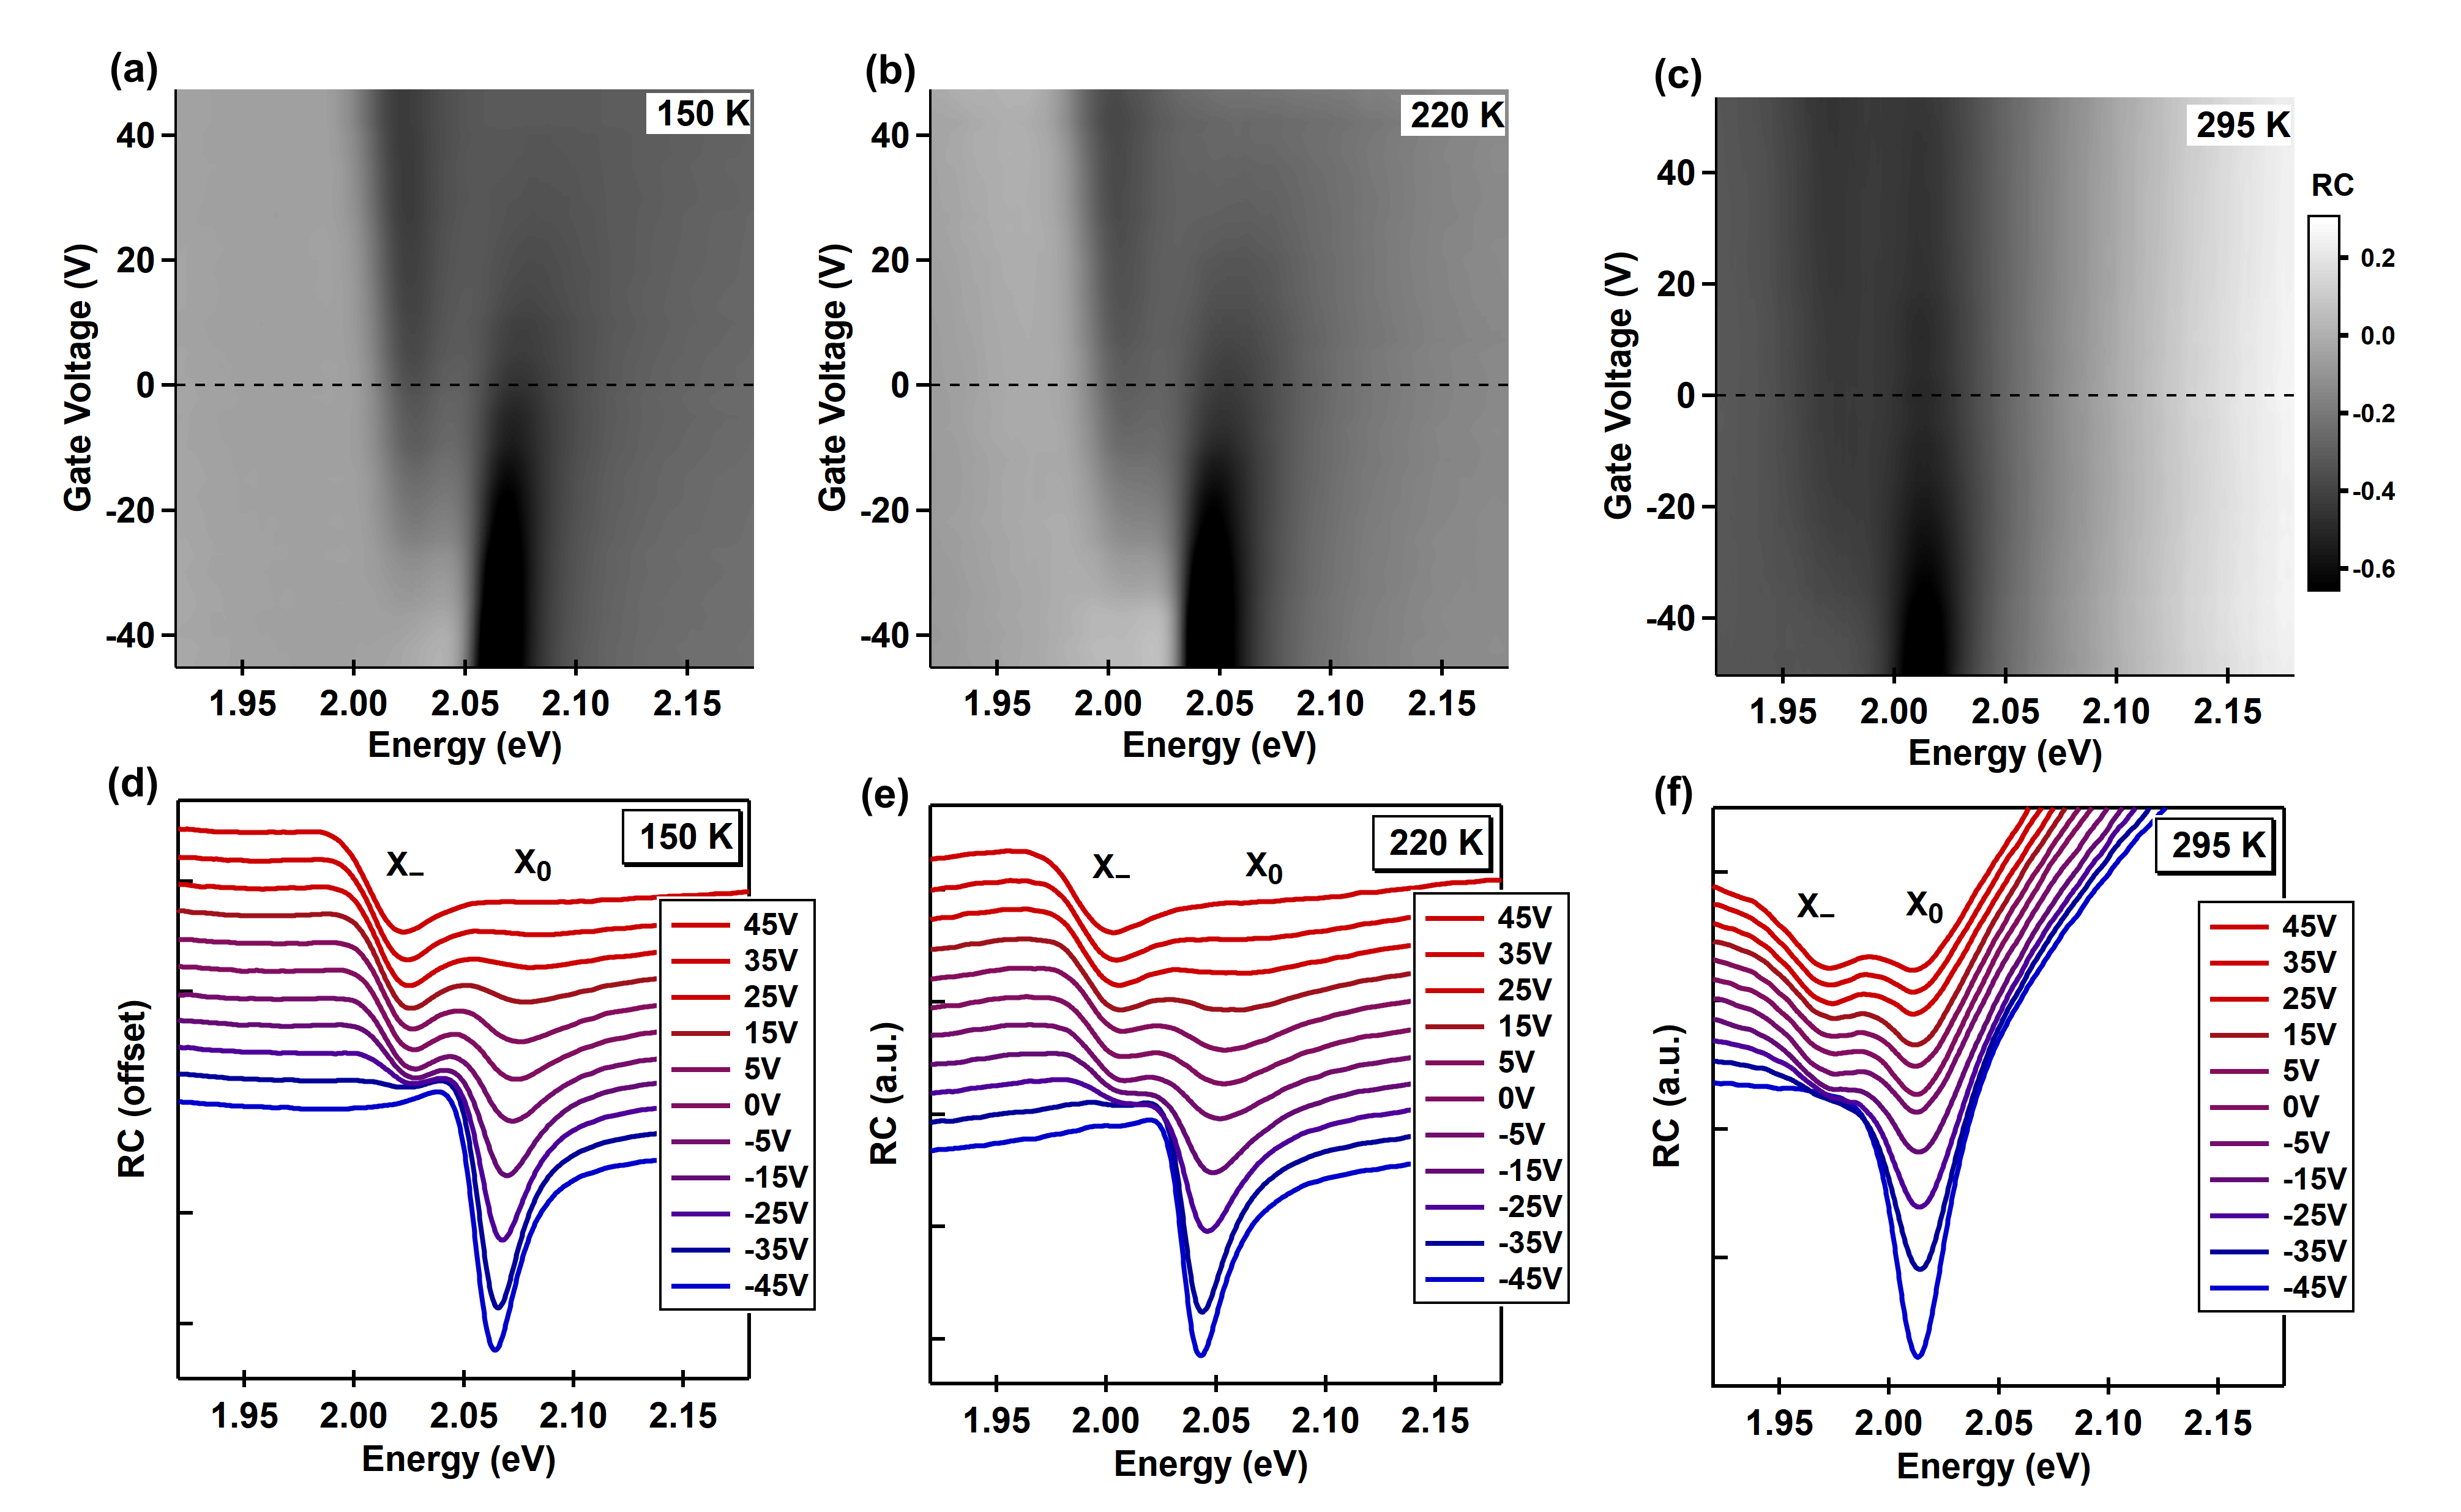


Figure S2: Steady-state RC spectra of ML-WS2 as a function of gate voltage at temperatures of 150, 220 and 295 K.

**S3. TAS results under resonant excitation**

To examine the dynamics of A exciton and trion species, we present the evolution of their spectra as a function of delay time and energy, as shown in Fig. S3. The TAS 2D plots depict transient reflection changes at different gate voltages, with linearly polarized pump and probe beams. The measurements were conducted with pump fluence of ~30 μJ/cm2, pump photon energy of 2.09 eV, temperature at 77 K. The populations of both neutral A exciton and trion build up rapidly, reaching their maxima at approximately ~0.3 ps after initial photoexcitation, and subsequently decay over longer timescales. With the gate voltage varying from -50 to 50 V, the trion (*ET* = 2.05 eV) population significantly increases, concurrent with the reduction of A exciton (*EA*= 2.09 eV) intensity. The prominent ground state bleaching (GSB, *ΔR/R* > 0) signatures of A exciton and trion are induced by the phase-space filling (Pauli blocking3), while the photoninduced absorption (PIA, *ΔR/R* < 0, at 2.02 eV) feature is attributed to the exciton–exciton interaction4.


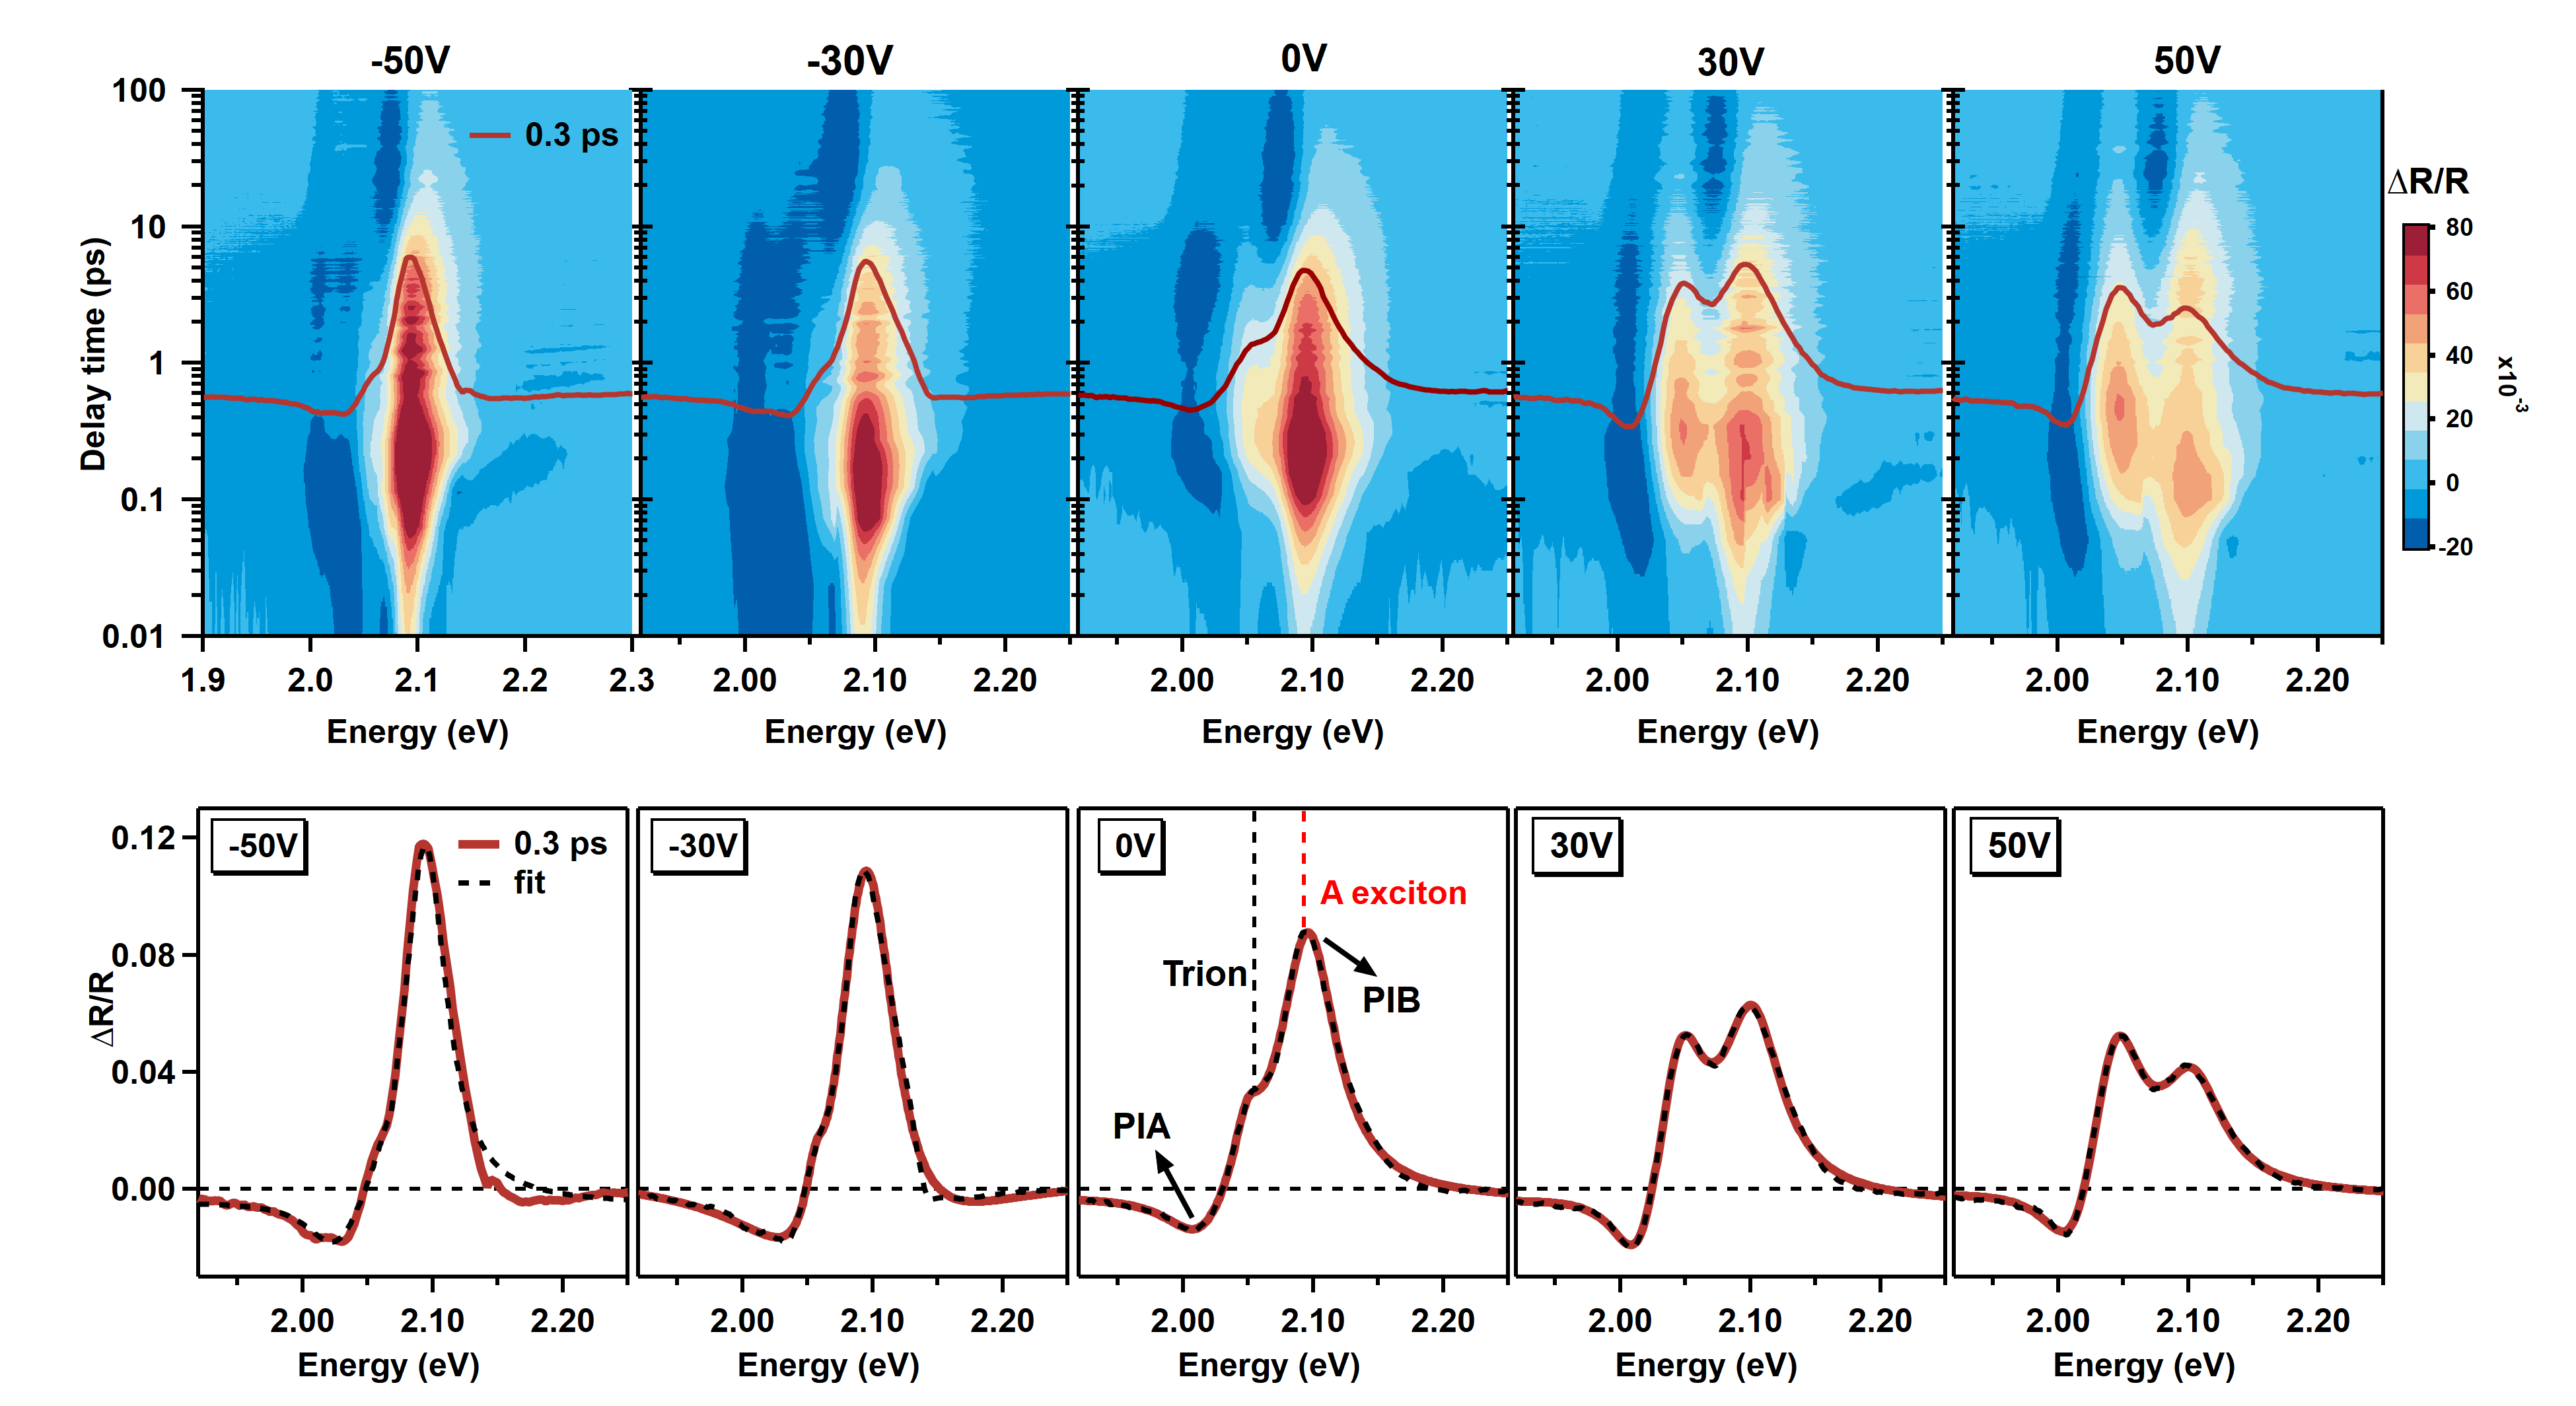


Figure S3: TAS results of ML-WS2 under resonant excitation at different gate voltages. The upper panels display 2D plots of reflection changes. The lower panels present cuts at 0.3 ps and Lorentzian fits.

**S4. TAS results by below-resonance excitation and pump-probe with opposite circular polarization (OCP) configuration**


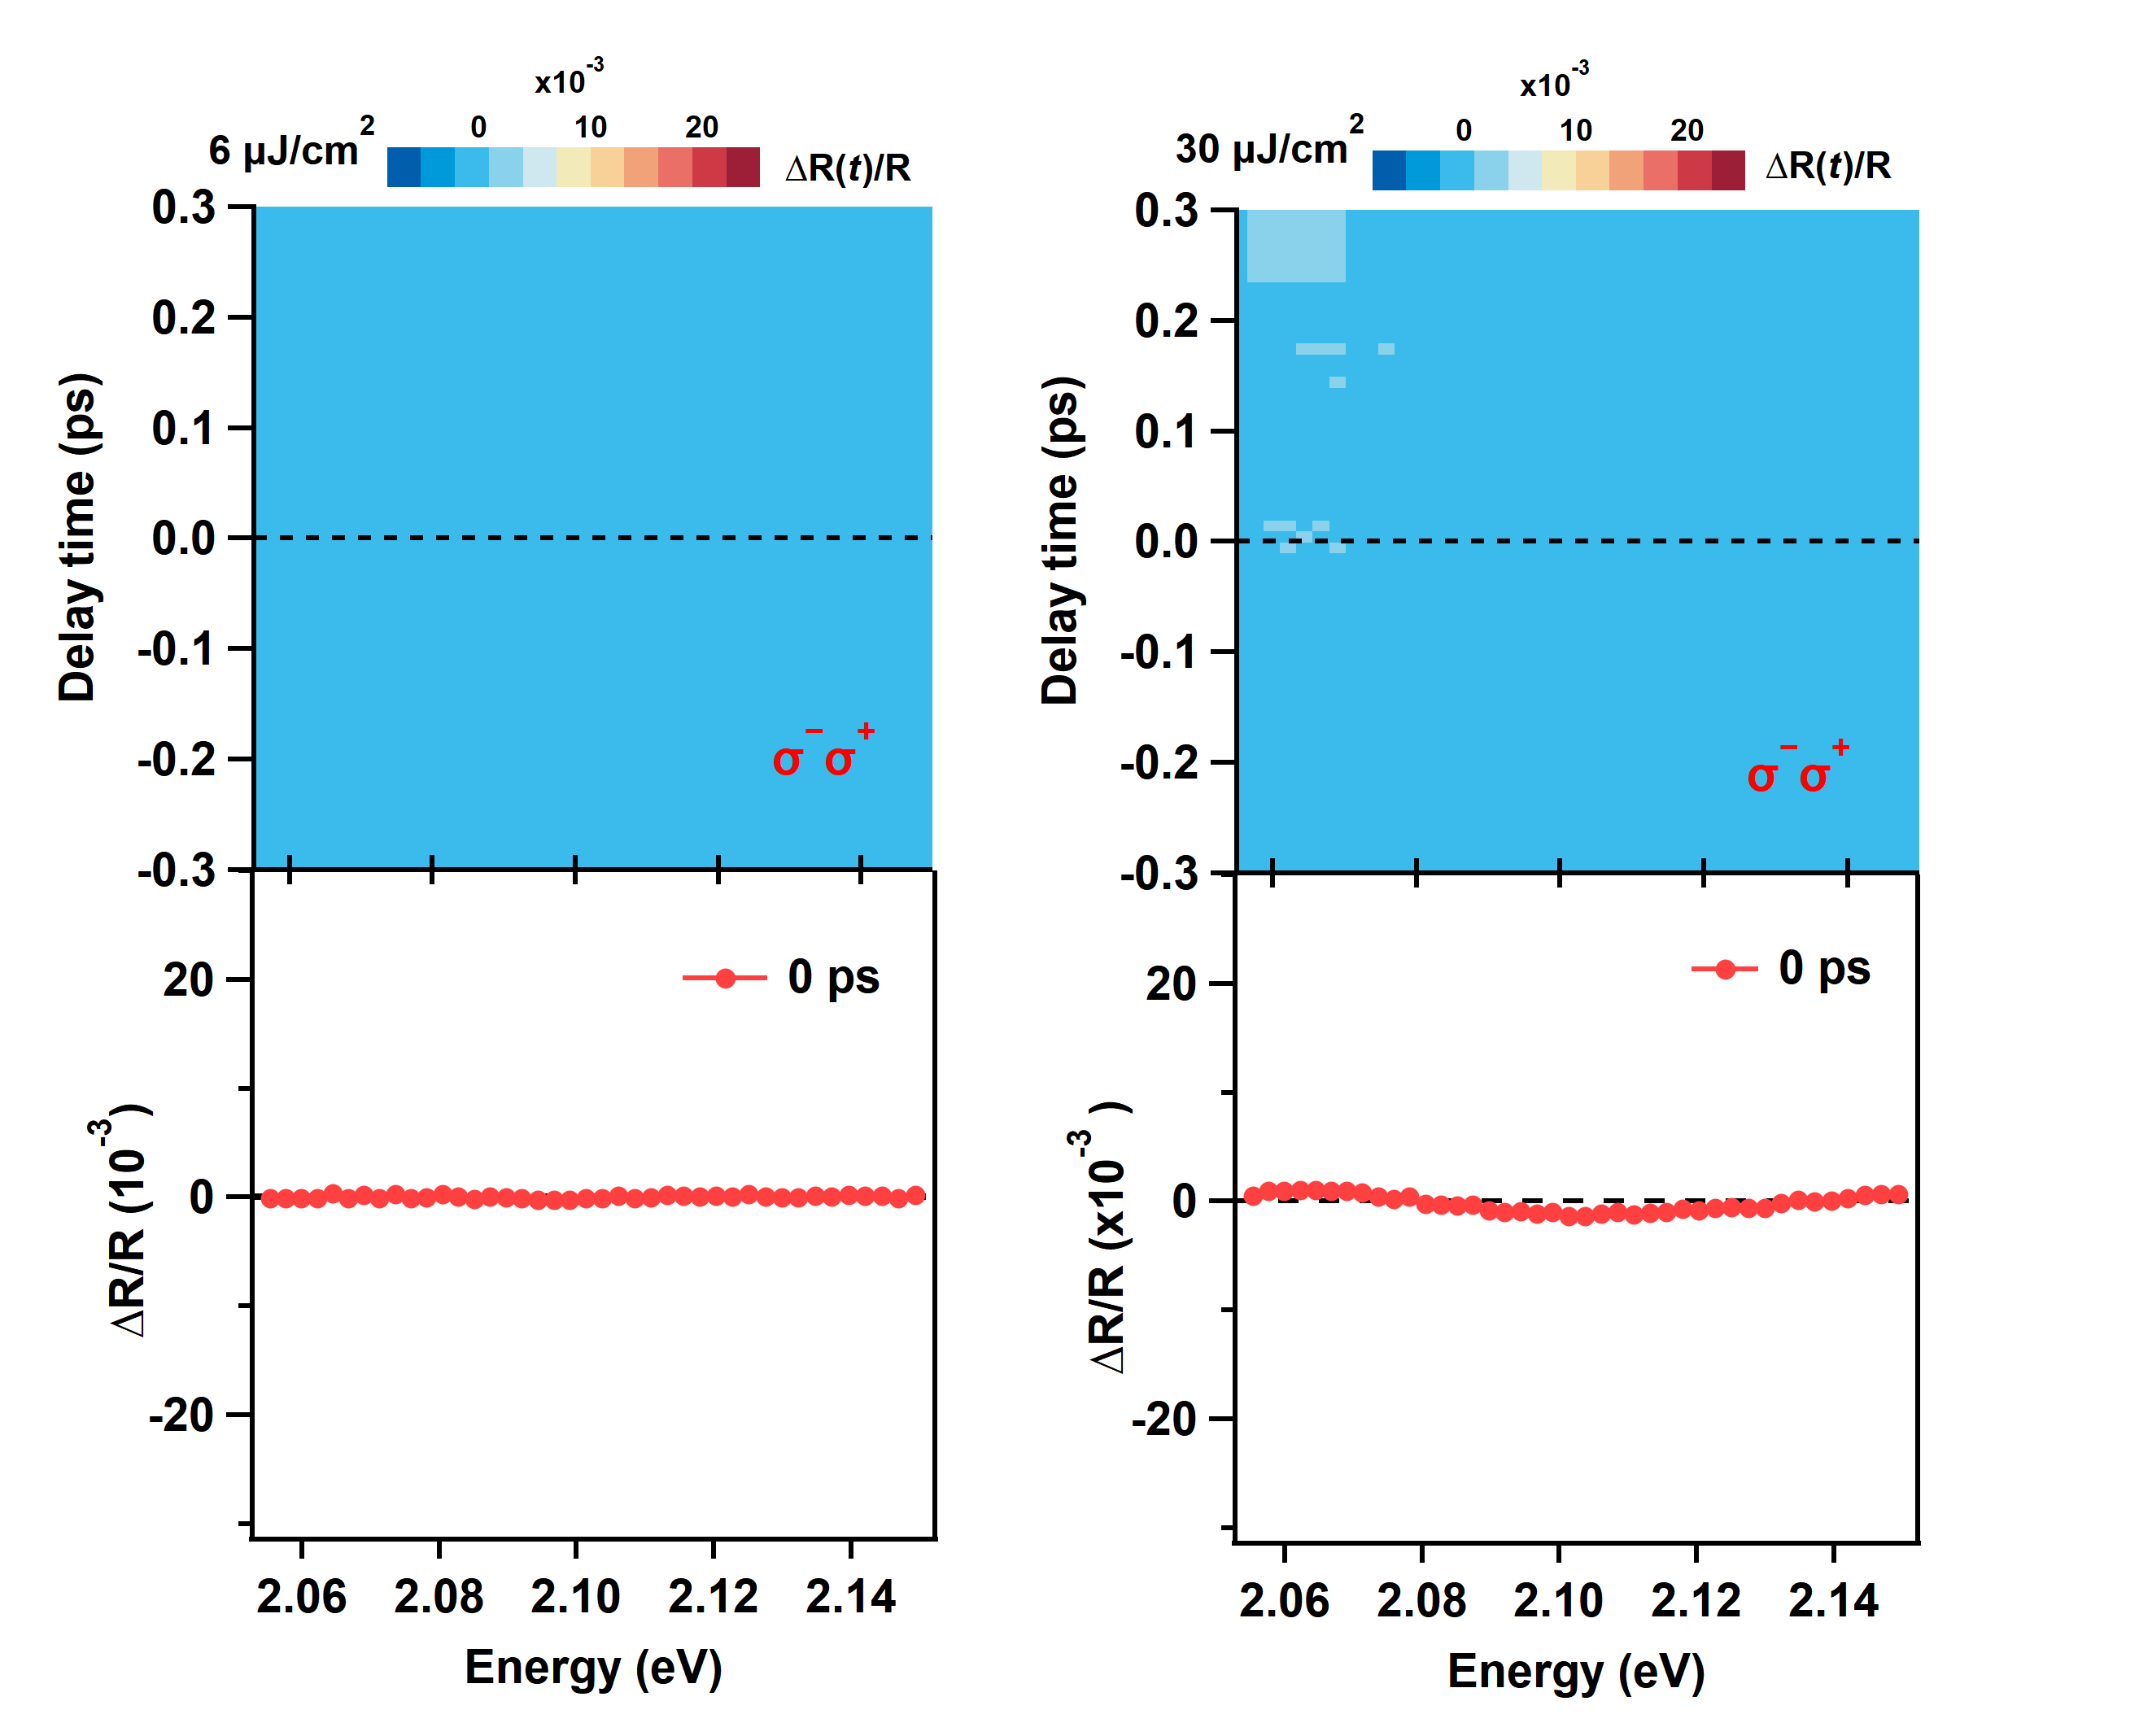


Figure S4: Upper panels present TAS images of ML-WS2 with OCP configuration at pump fluences of 6 *uJ*/cm2 and 30 *uJ*/ cm2. The pump photon energy is 1.82 eV, well below the trion and A exciton, and pump-probe polarization configuration is σ-σ+. Lower panels show transient curves at 0 ps extracted from upper panels.

**S5. The optical Stark effect at different gate voltages**


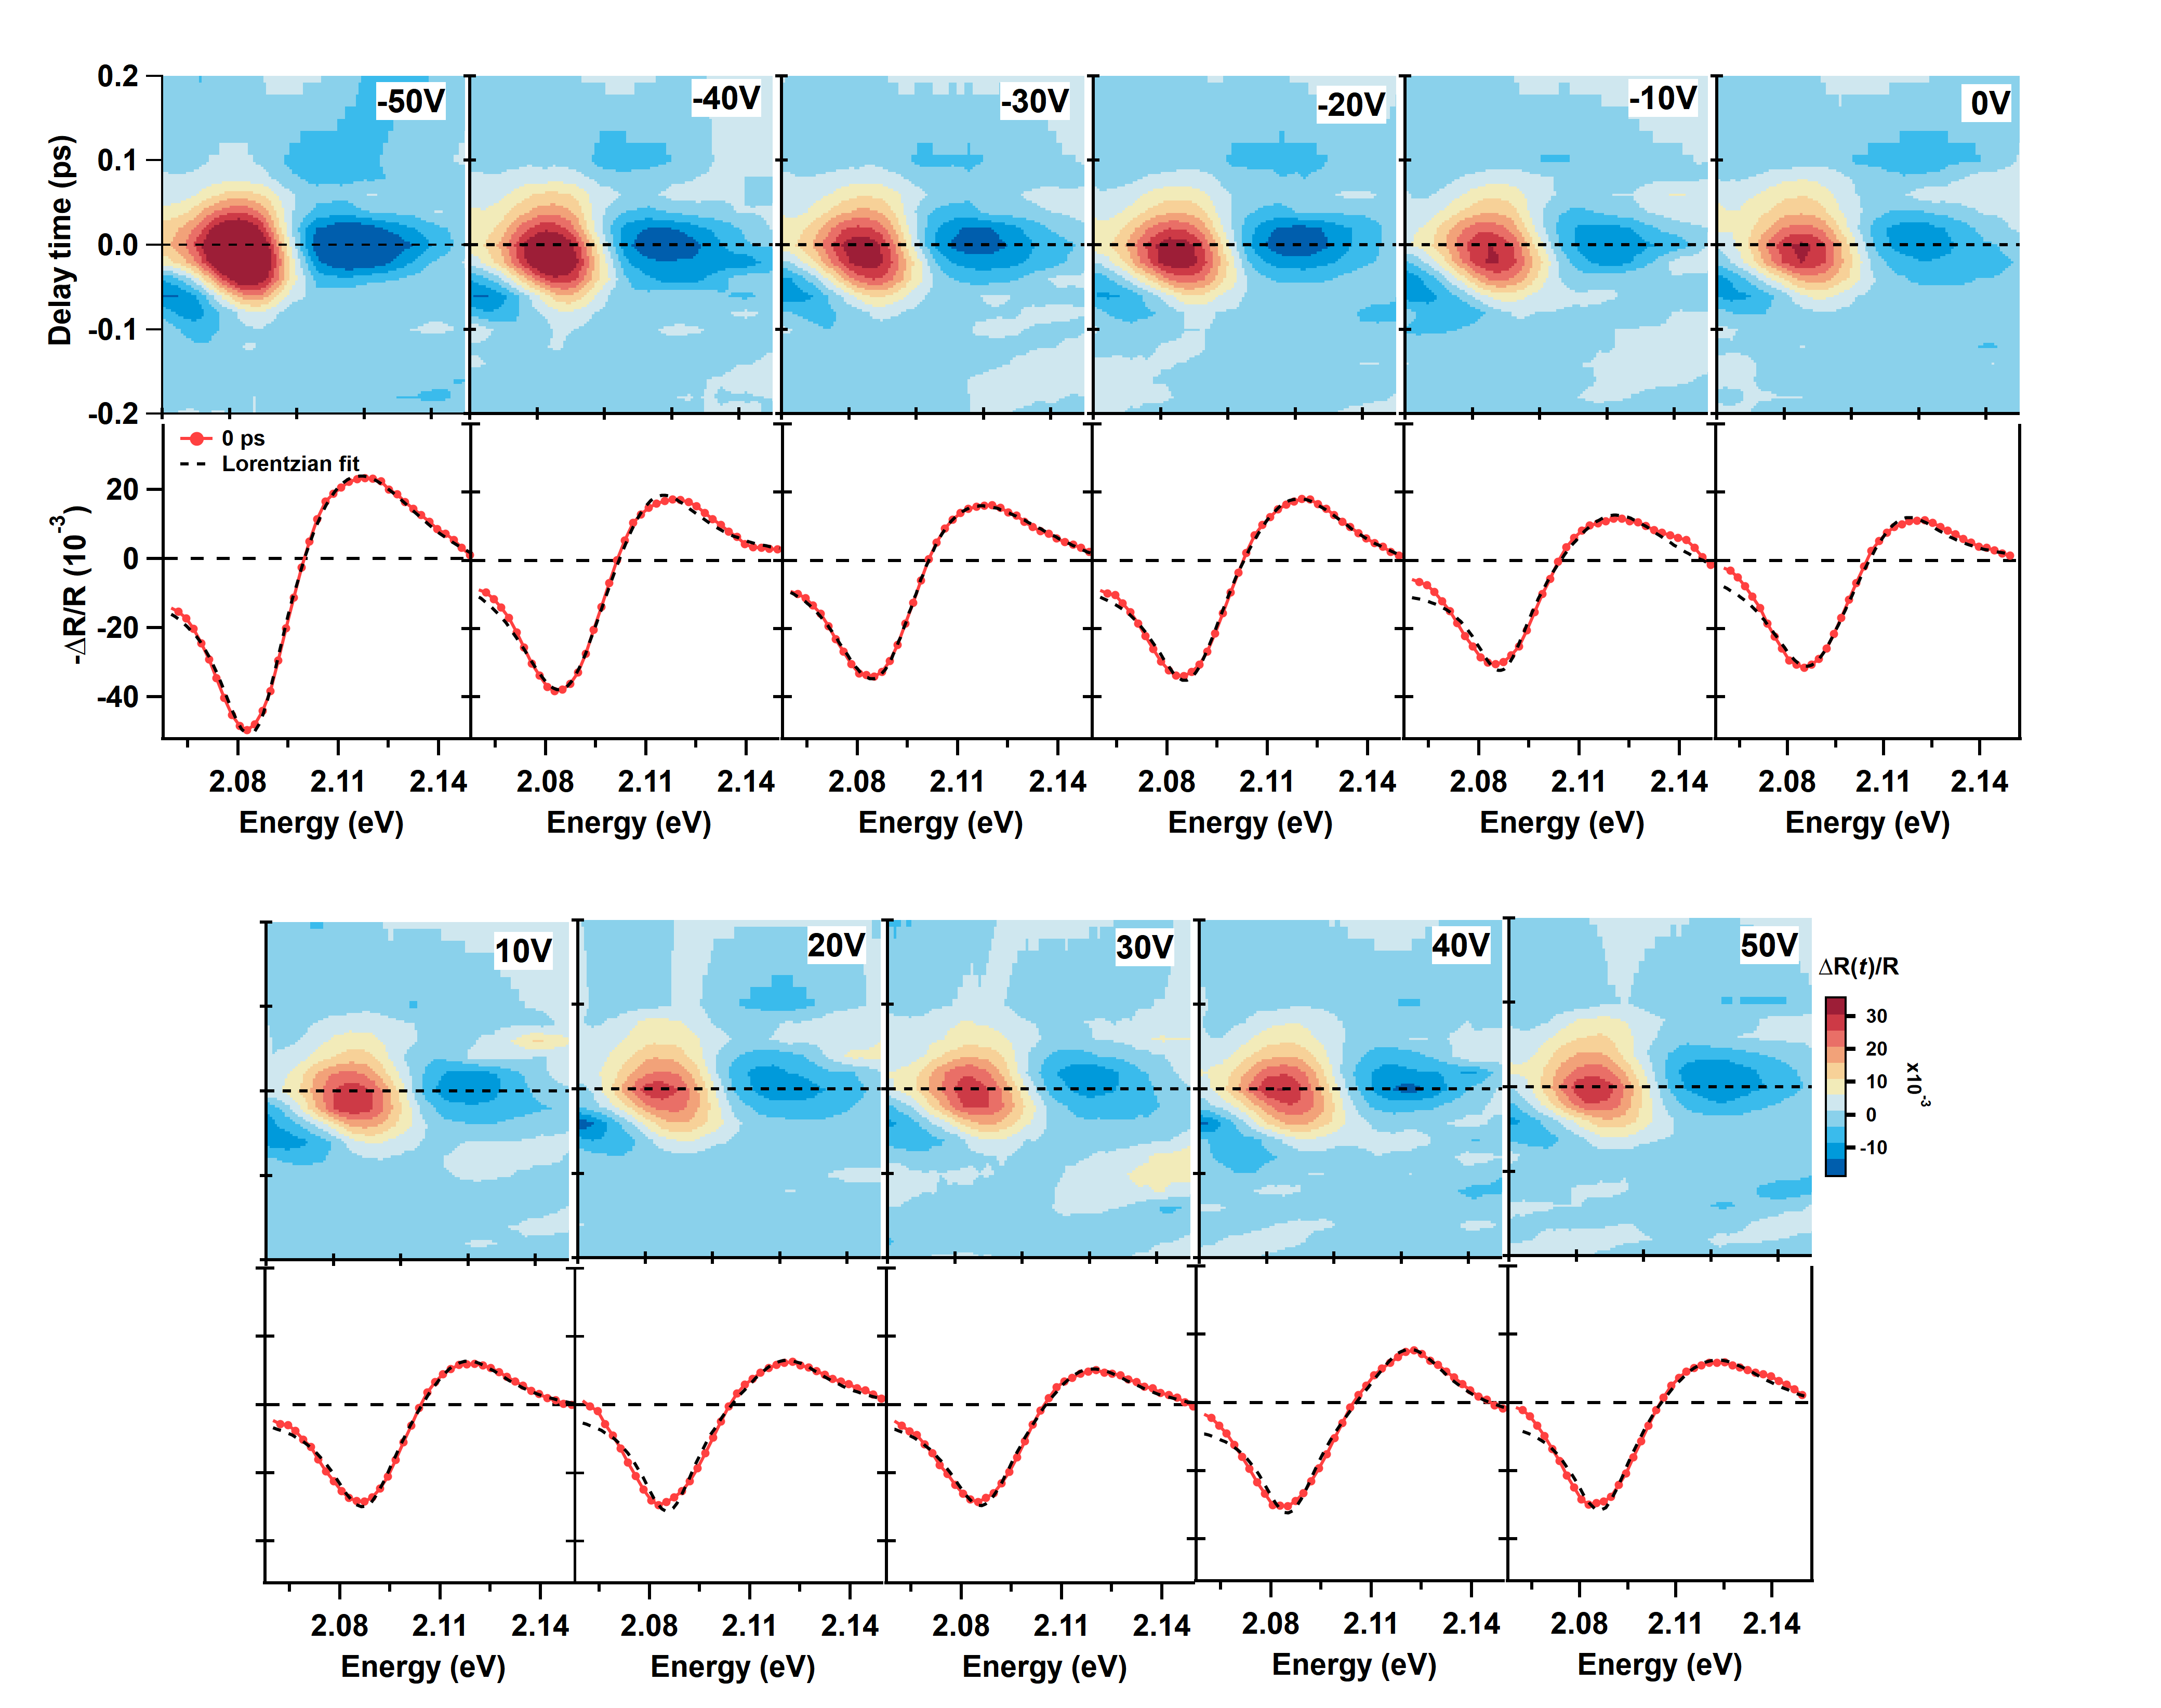


Figure S5: Systematic TAS images from -50 to 50V with an interval of 10 V. The pump photon energy is 1.82 eV, with pump-probe polarization configuration σ-σ-. The red curves present transient reflection changes at 0 ps. The dashed lines are Lorentzian fit with a blue shift.

**S6. Transient RC spectra and the OSE-induced blue shift from -50 to 50 V**


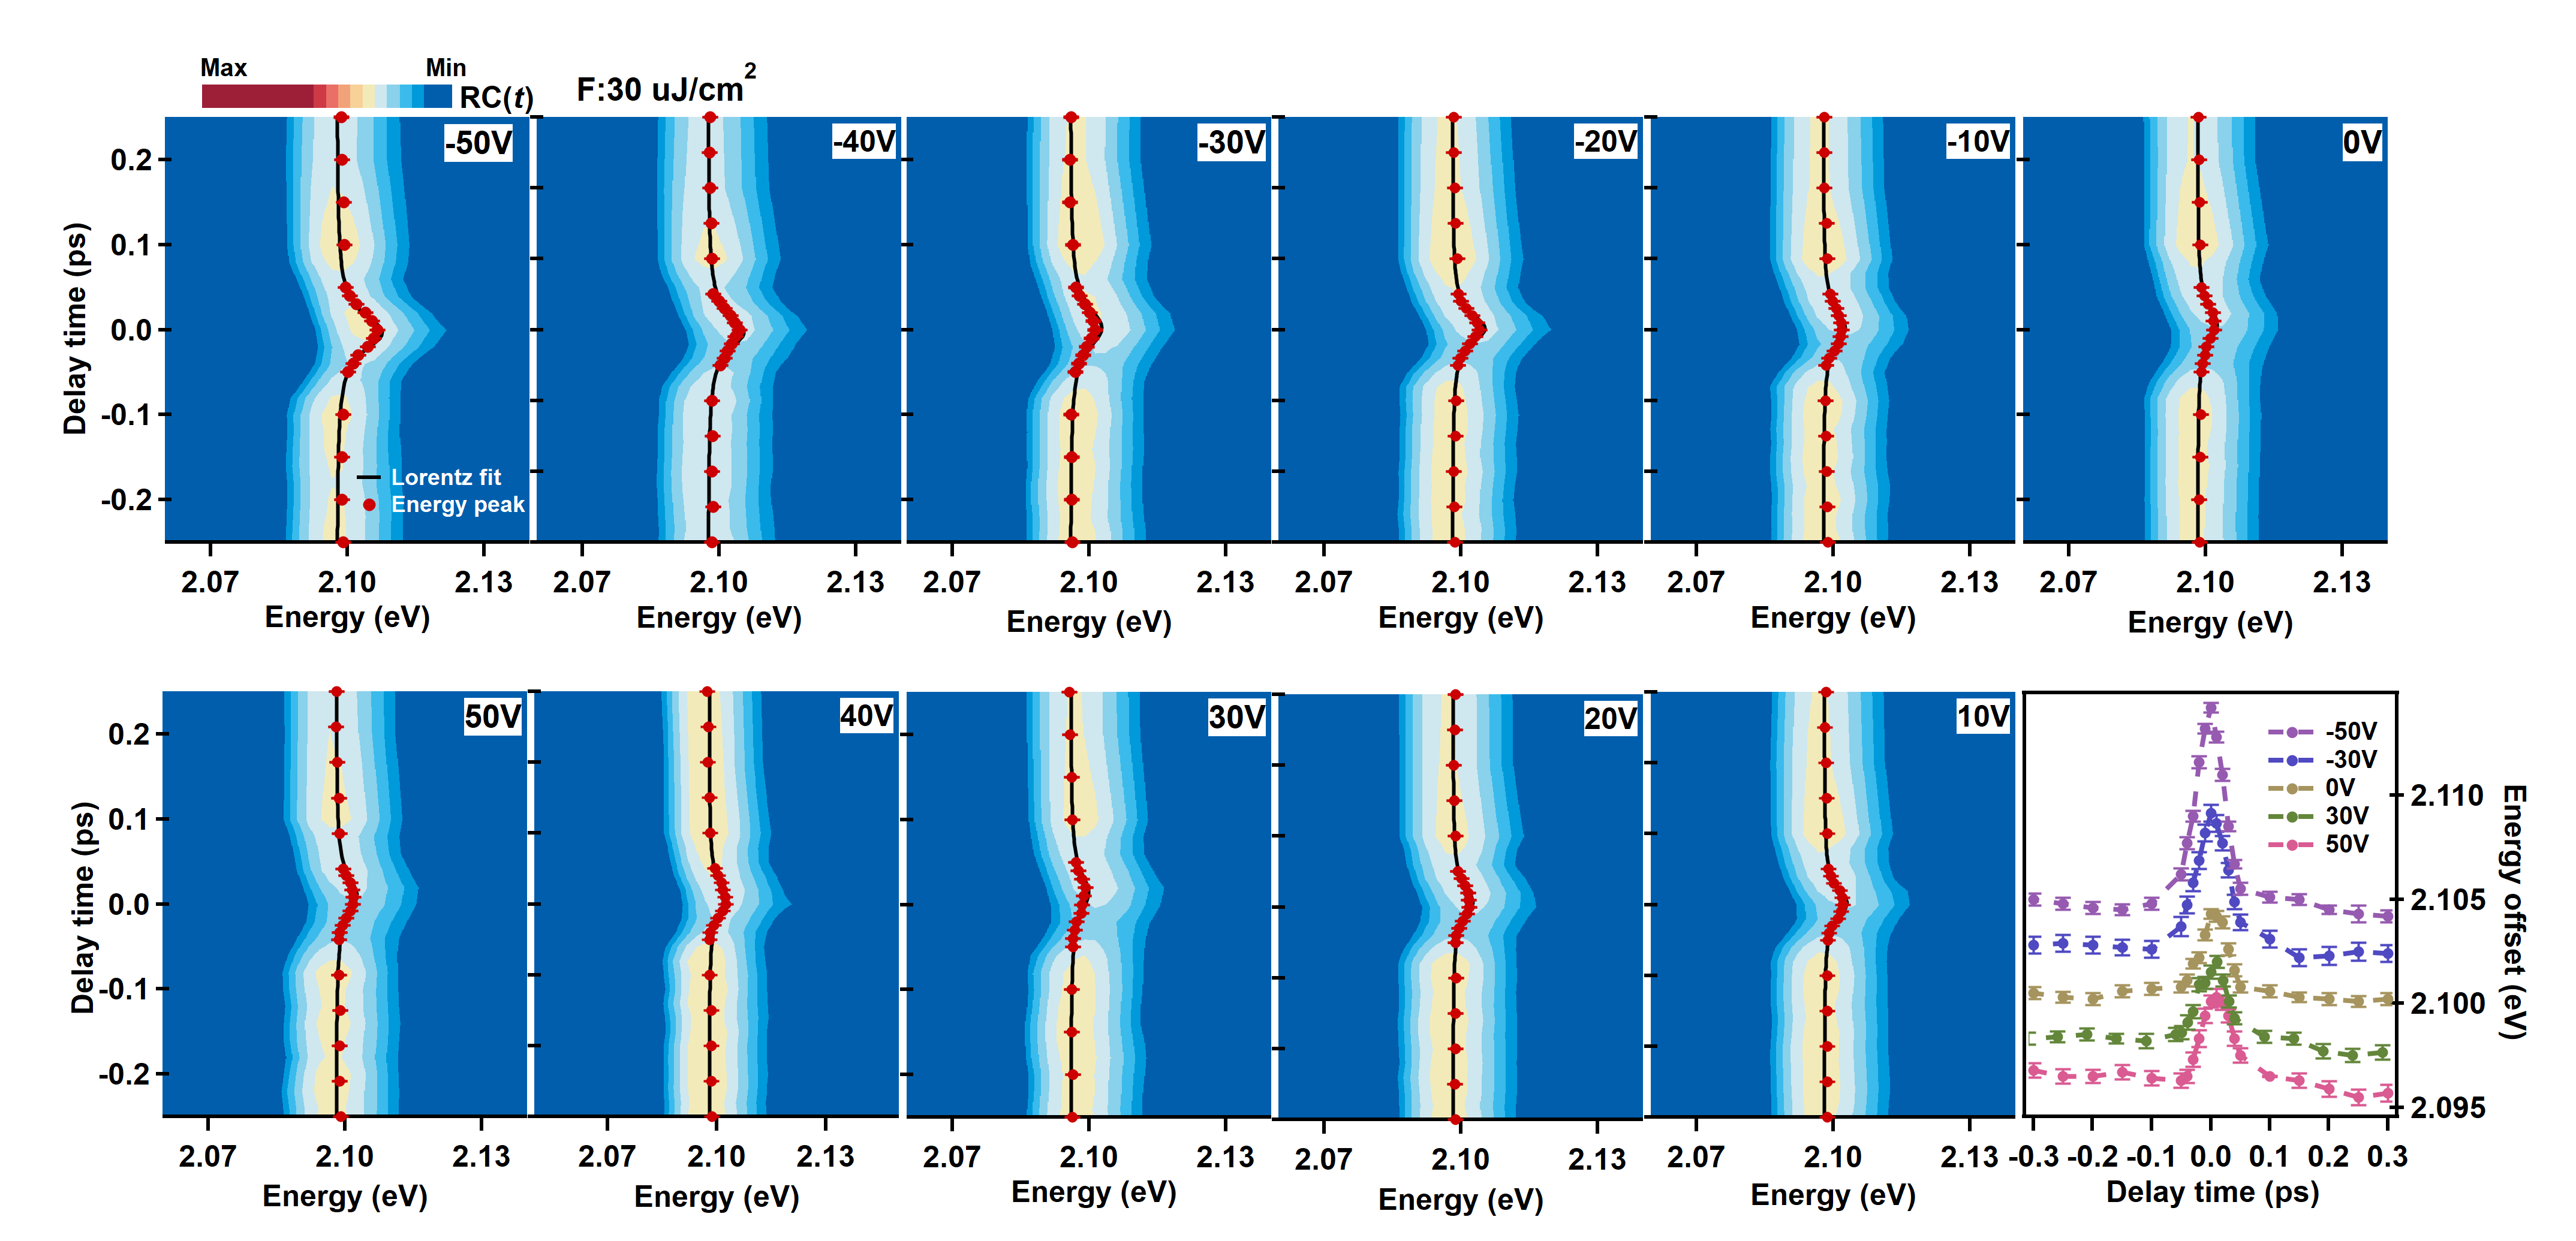


Figure S6: Transient RC images derived from Fig. S5 by integrating the steady-state RC spectrum. The red dots are peak positions obtained from Lorentzian fits.

**S7. The optical Stark effect as a function of pump fluence at 0 V**


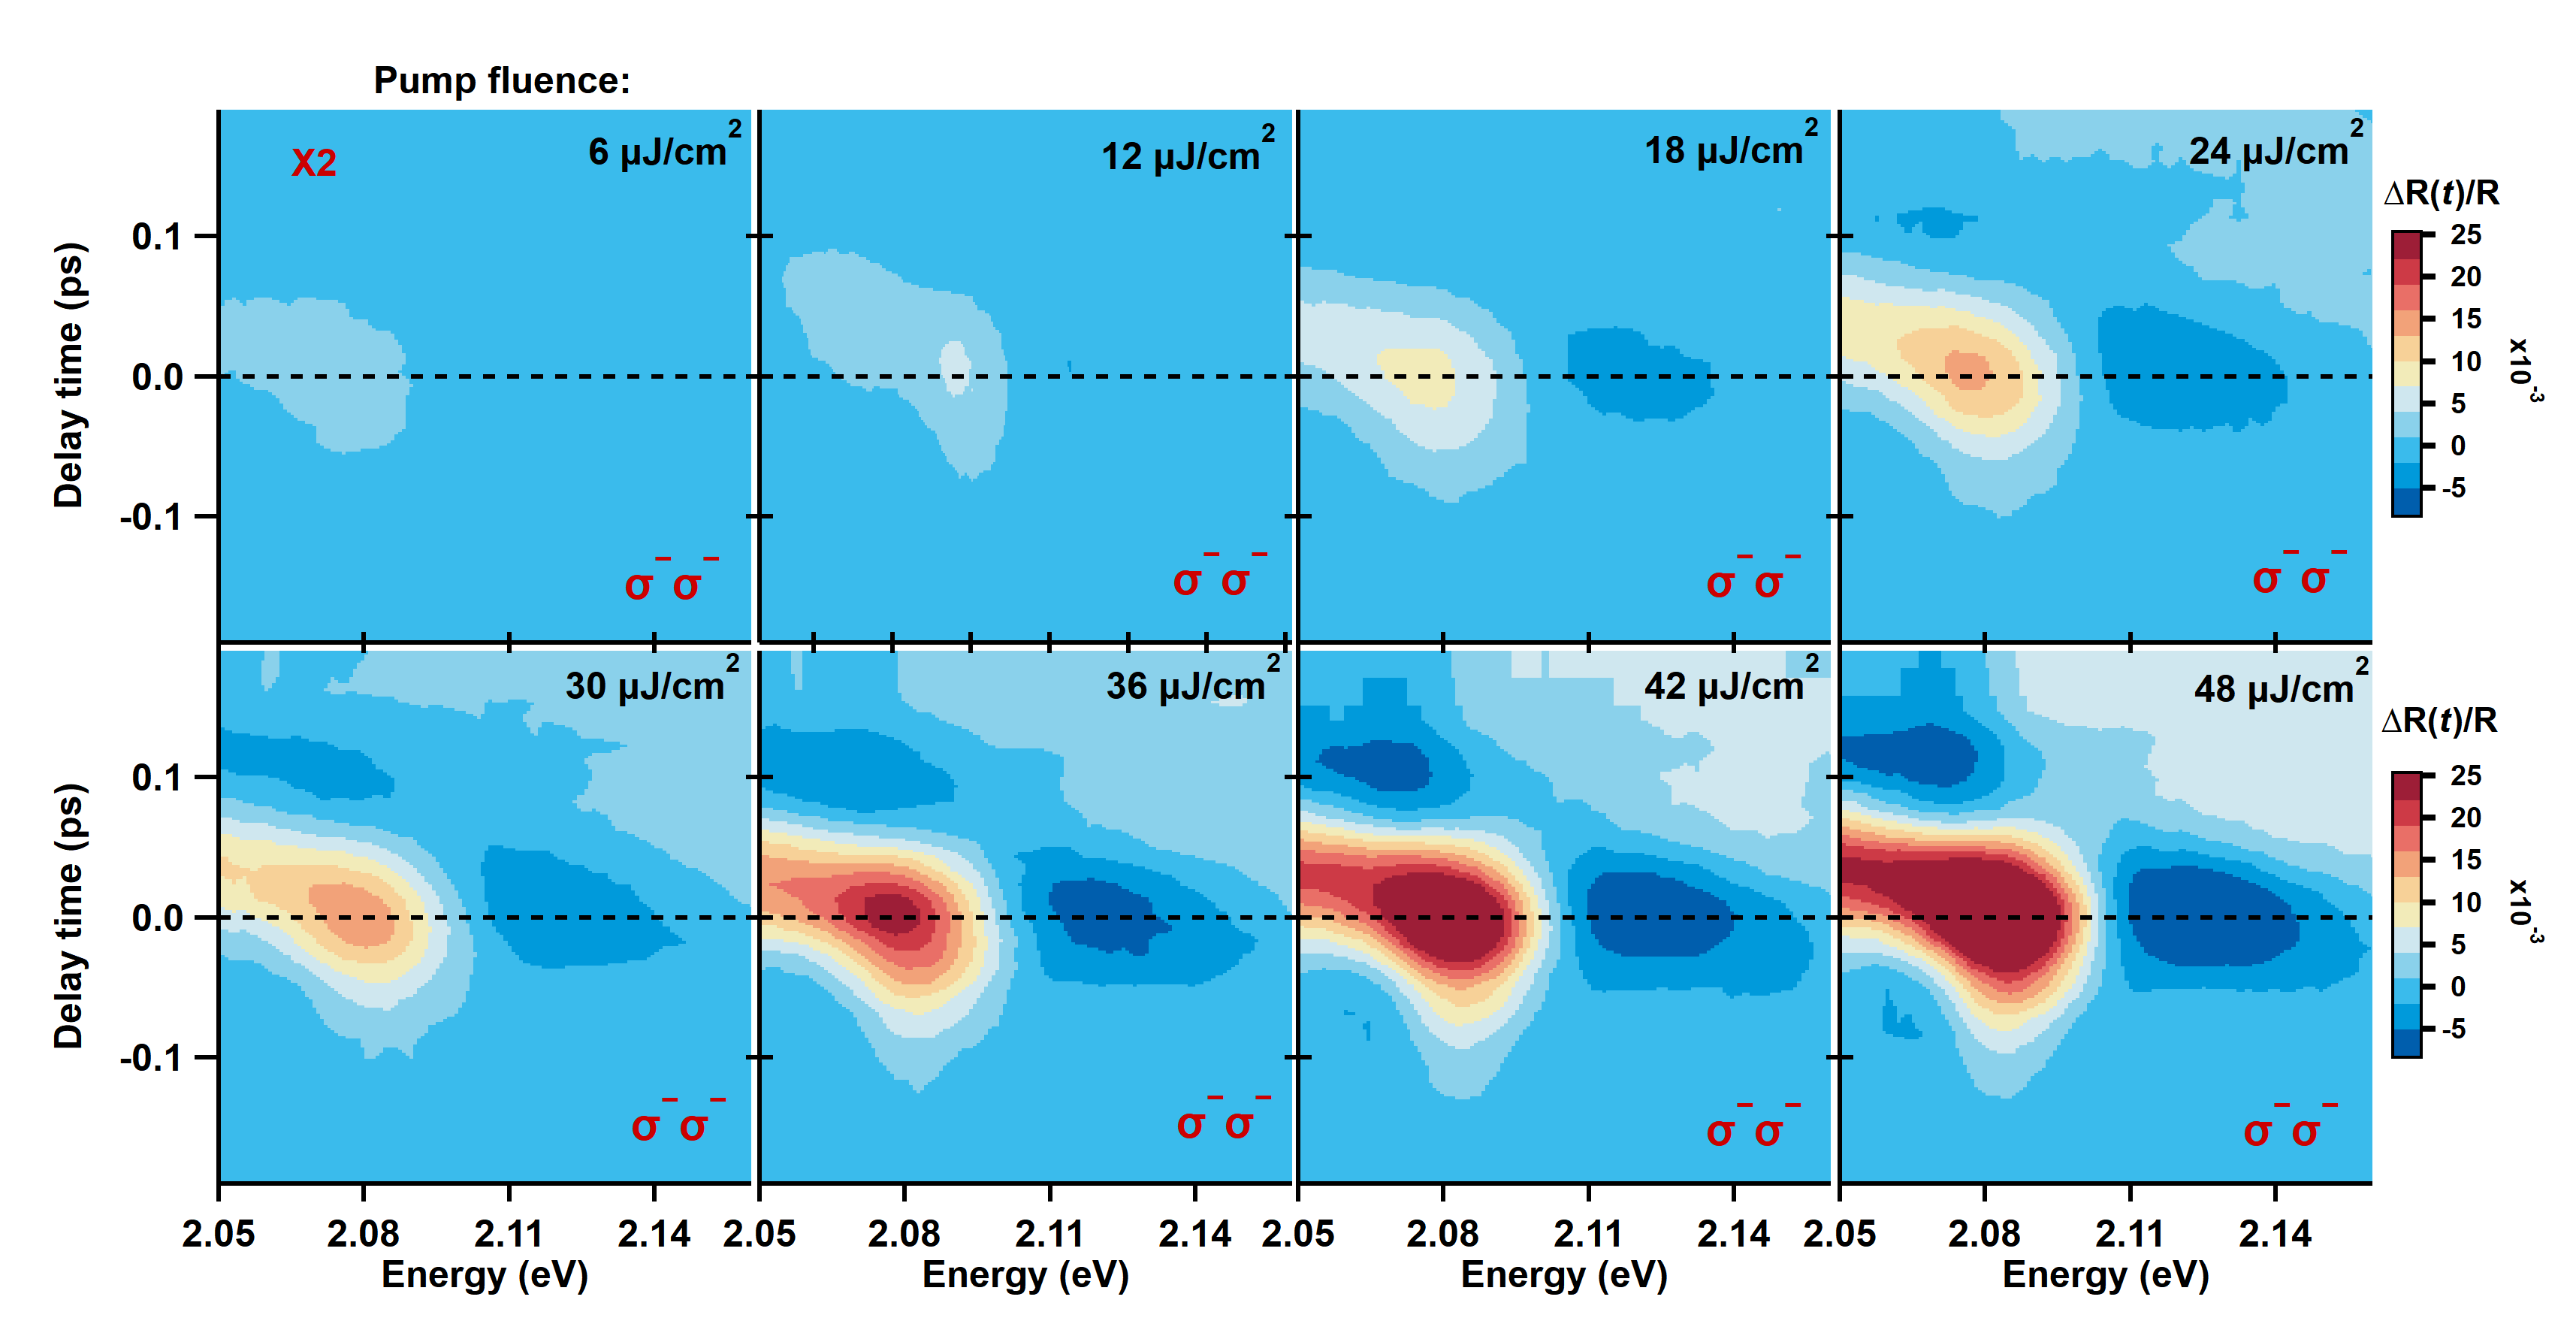


Figure S7: Fluence-dependent ΔR/R images as a function of pump fluence, with gate voltage at 0 V, pump photon energy of 1.82 eV, and pump-probe polarization configuration σ-σ-.

**S8. Transient RC spectra and the OSE-induced blue shift as a function of pump fluence**





Figure S8: Left images are the transient RC spectra converted from Fig. S7, by integrating with the steady-state RC spectrum. The red dots are peak positions obtained from Lorentzian fits. Right panel shows the OSE-induced blue shift as a function of pump fluence, extracted from left images.

1. Liu, H. L. *et al.* Deep-ultraviolet Raman scattering spectroscopy of monolayer WS2. *Sci. Rep.* **8**, 11398 (2018).

2. Zhu, B., Chen, X. & Cui, X. Exciton binding energy of monolayer WS2. *Sci. Rep.* **5**, 9218 (2015).

3. Wang, H., Zhang, C., Chan, W., Manolatou, C., Tiwari, S.& Rana, F. Radiative lifetimes of excitons and trions in monolayers of the metal dichalcogenide MoS2. *Phys. Rev. B* **93**, 045407 (2016).

4. Schmitt, R. S., Chemla, D. S. & Miller, D. A. Theory of transient excitonic optical nonlinearities in semiconductor quantum-well structures. *Phys. Rev. B* **32**, 6601-6609 (1985).
